# Supplementary material
Source: PubMed Central journal article supplement (PMC2896457)
Supplement: NIHMS182318-supplement-supplement_1.pdf [file NIHMS182318-supplement-supplement_1.pdf]

## Supplemental Data

Figure 1. Meta-analysis of the association between -141C Ins/Del polymorphism (Del carrier vs. Ins/Ins) and antipsychotic drug response in studies of first-episode schizophrenia patients.

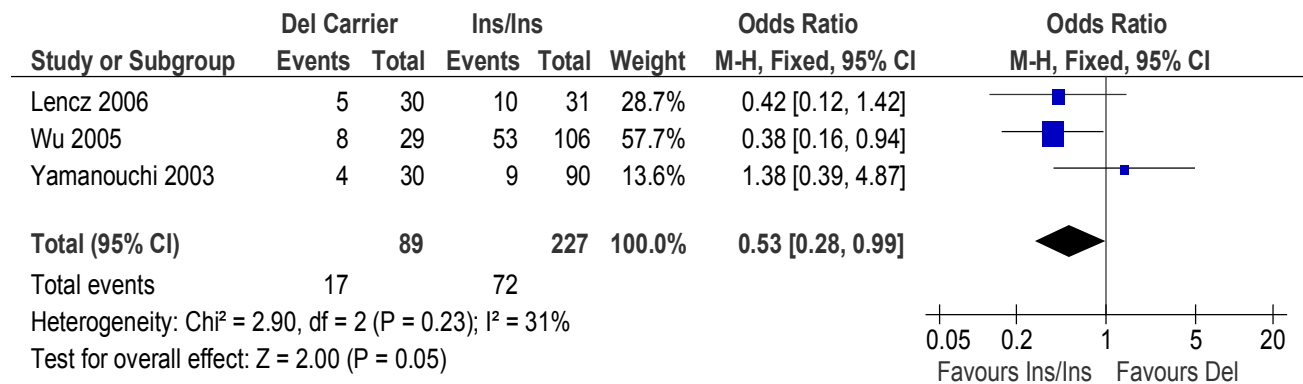

Note: M-H: Mantel-Haenszel method.

Figure 2. Meta-analysis of the association between -141C Ins/Del polymorphism

(Del carrier vs. Ins/Ins) and antipsychotic drug response: A random effect model.

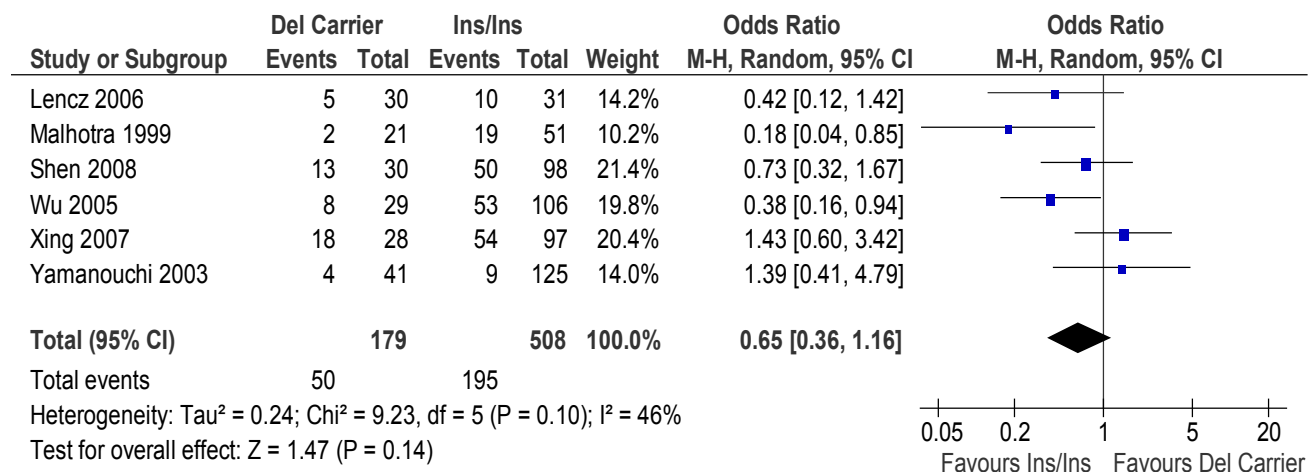

Note: M-H: Mantel-Haenszel method.
